# Supplementary material for: Cancer Immunotherapeutic Potential of NKTT320, a Novel, Invariant, Natural Killer T Cell-Activating, Humanized Monoclonal Antibody
Source: MDPI journal article supplement (doi:10.3390/ijms21124317), 2020-06-17
Supplement: s1 [file s1]

Sup Fig. 1

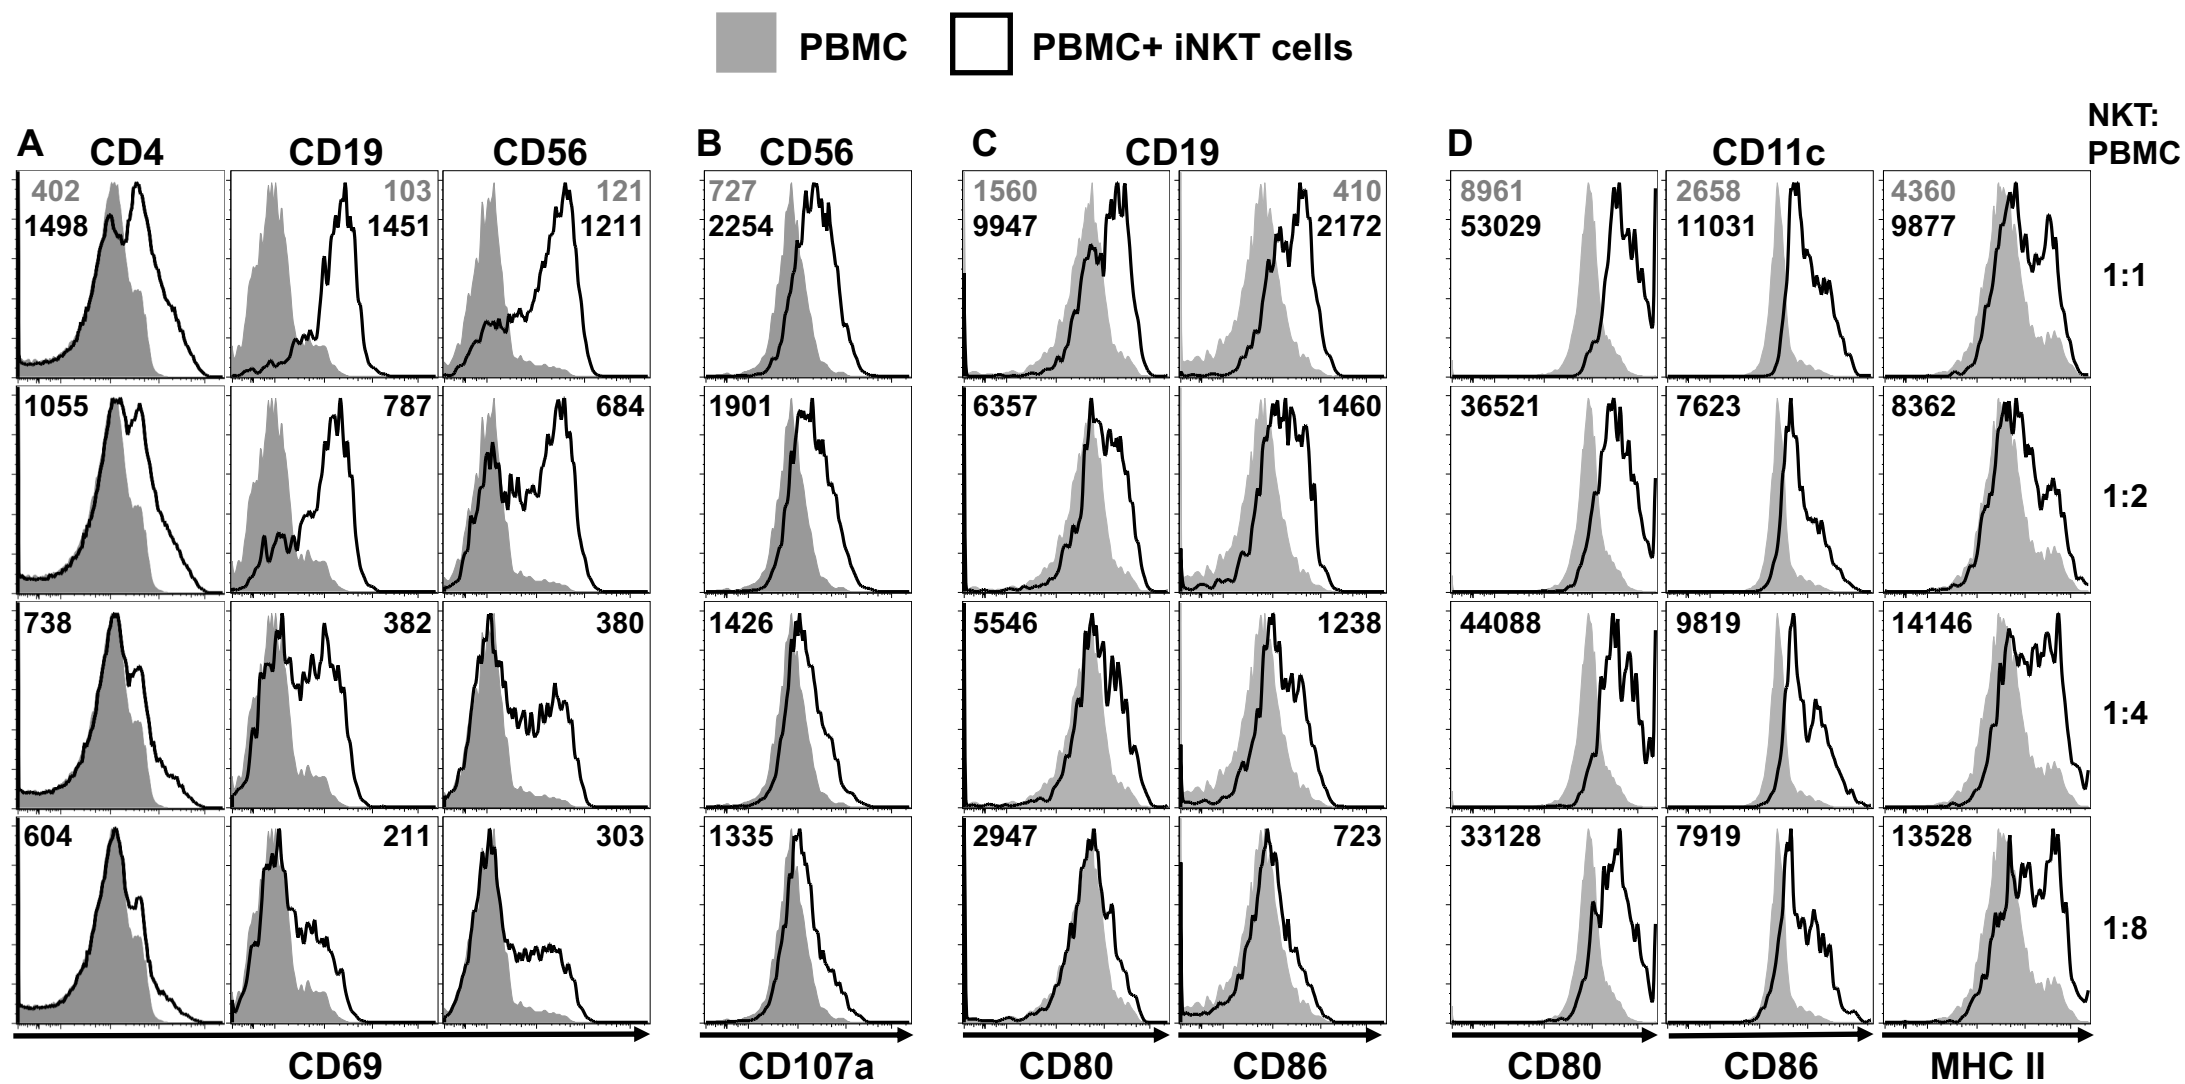

## Supplemental Figure Legends

**Sup Figure 1. Soluble NKTT320 promotes human NKT cell-mediated transactivation of bystander immune cells.** Freshly isolated human iNKTs were co-cultured with autologous PBMCs at different ratios as indicated. Control wells had PBMCs alone. Both control and experimental wells received soluble NKTT320 mAb (10  $\mu\text{g/ml}$ ). After 24 h, cells were harvested and analyzed for (A) CD69 and (B) CD107a expression on different immune cells by flow cytometry. (C, D) Surface expression of co-stimulatory molecules (CD80, CD86) and MHC II expression on B (CD19+) and myeloid cells (CD11c+) were assessed by flow cytometry. Representative histograms (with MFI) from one of three independent experiments are shown. Numbers in the histograms indicate MFI.
